# Supplementary material for: A highly sensitive fluorescent sensor for Al3+and Zn2+based on a diarylethene salicylhydrazide Schiff base derivative and its bioimaging in live cells
Source: Royal Society of Chemistry journal article supplement (doi:10.1039/c6nj01458e), 2016-01-01
Supplement: c6nj01458e1.pdf [file c6nj01458e1.pdf]

## Supplementary Information

### Highly sensitive fluorescent sensor for Al<sup>3+</sup> and Zn<sup>2+</sup> based on a diarylethene salicylhydrazide Schiff base derivative and its bioimaging in live cells

Yinglong Fu, Yayi Tu, Congbin Fan\*, Chunhong Zheng, Gang Liu, Shouzhi Pu\*

*Jiangxi Key Laboratory of Organic Chemistry, Jiangxi Science and Technology Normal*

*University, Nanchang 330013, PR China*

\*Corresponding author: E-mail address: [congbinfan@163.com](mailto:congbinfan@163.com) (C. Fan),

[pushouzhi@tsinghua.org.cn](mailto:pushouzhi@tsinghua.org.cn) (S. Pu); Tel./Fax: +86-791-83831996.

#### Content

**Fig. S1.** <sup>1</sup>H NMR (400 MHz, DMSO) spectrum of **10**.

**Fig. S2.** <sup>13</sup>C NMR (100 MHz, DMSO) spectrum of **10**.

**Fig. S3.** IR spectra of **10**.

**Fig. S4.** Changes in fluorescence and color of **1** induced by Zn<sup>2+</sup>/EDTA and light stimuli in methanol (2.0 × 10<sup>-5</sup> mol L<sup>-1</sup>): (a) **10** induced by Zn<sup>2+</sup>; (b) **10''** induced by photoirradiation; (c) **1C** induced by Zn<sup>2+</sup>; (d) photos demonstrating changes in its fluorescence.

**Fig. S5.** (a) Job's plot showing the 1 : 1 complex of **10** with Zn<sup>2+</sup>; (b) Hildebrand–Benesi plot based on the 1 : 1 for **10**, the binding constant of **10** with Zn<sup>2+</sup> was calculated to be 1.42 × 10<sup>4</sup> L mol<sup>-1</sup>; (c) the limit of detection (LOD), LOD is 3.33 × 10<sup>-7</sup> mol L<sup>-1</sup>.

**Fig. S6.** ESI-MS spectrum changes in methanol: (a) [**10**+Al<sup>3+</sup>+2NO<sub>3</sub><sup>-</sup>-2H]<sup>-</sup>; (b) [**10**+Zn<sup>2+</sup>+NO<sub>3</sub><sup>-</sup>+H]<sup>+</sup>.

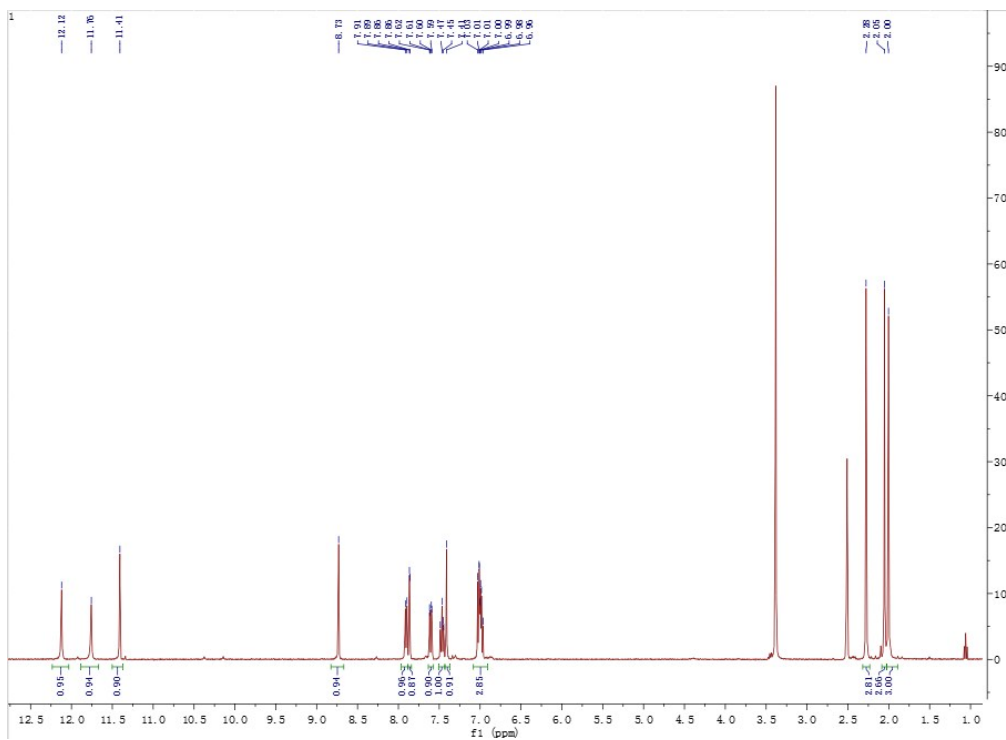

**Fig. S1.**  $^1\text{H}$  NMR (400 MHz, DMSO) spectrum of **10**.

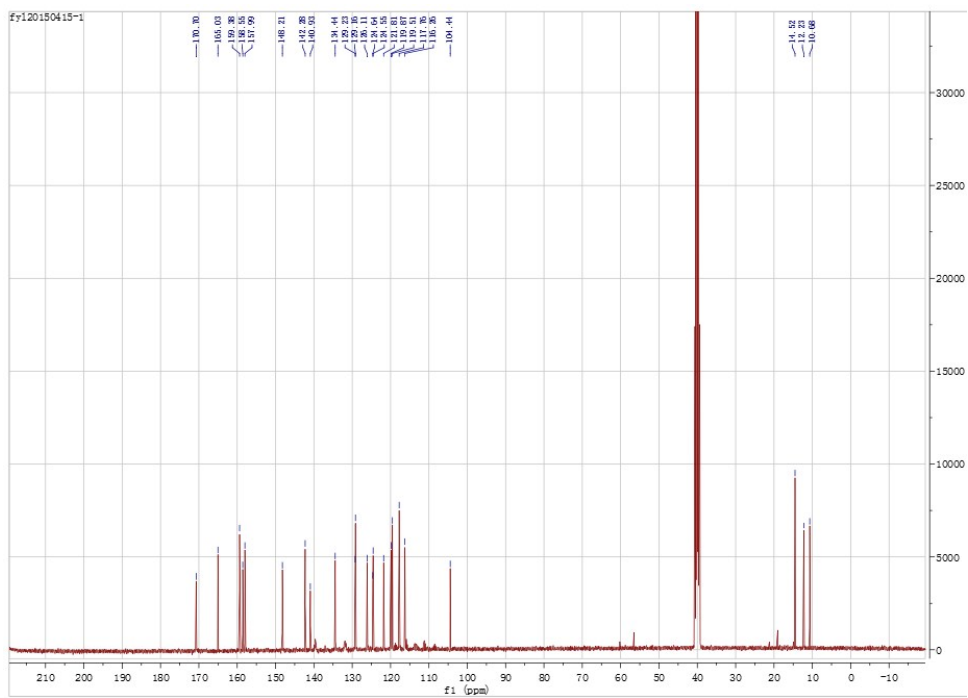

**Fig. S2.**  $^{13}\text{C}$  NMR (100 MHz, DMSO) spectrum of **10**.

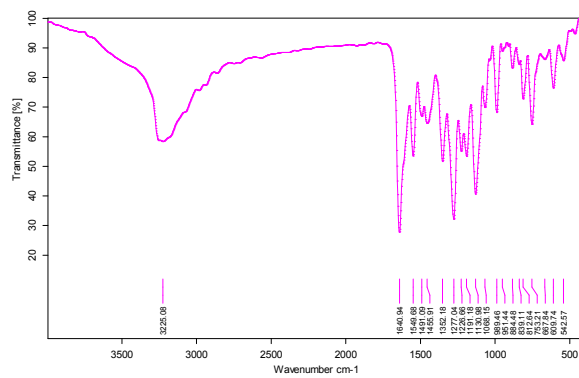

**Fig. S3.** IR spectra of **10**.

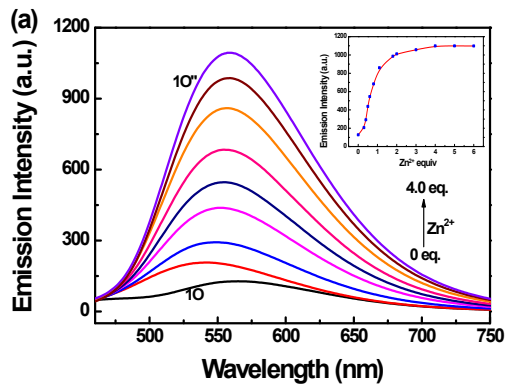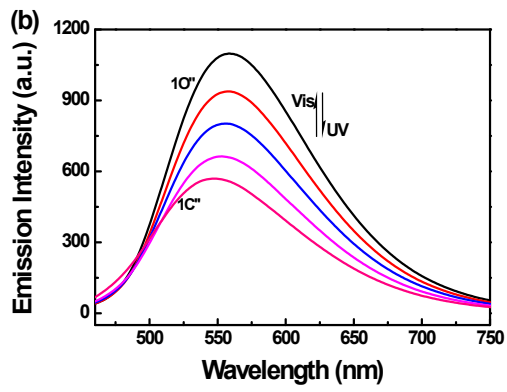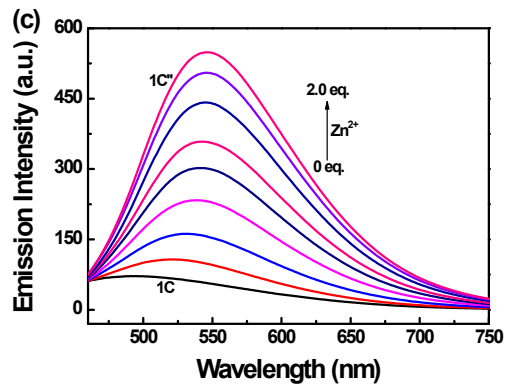

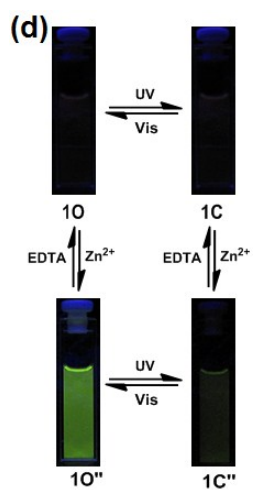

**Fig. S4.** Changes in fluorescence and color of **1** induced by  $Zn^{2+}$ /EDTA and light stimuli in methanol ( $2.0 \times 10^{-5} \text{ mol L}^{-1}$ ): (a) **1O** induced by  $Zn^{2+}$ ; (b) **1O''** induced by photoirradiation; (c) **1C** induced by  $Zn^{2+}$ ; (d) photos demonstrating changes in its fluorescence.

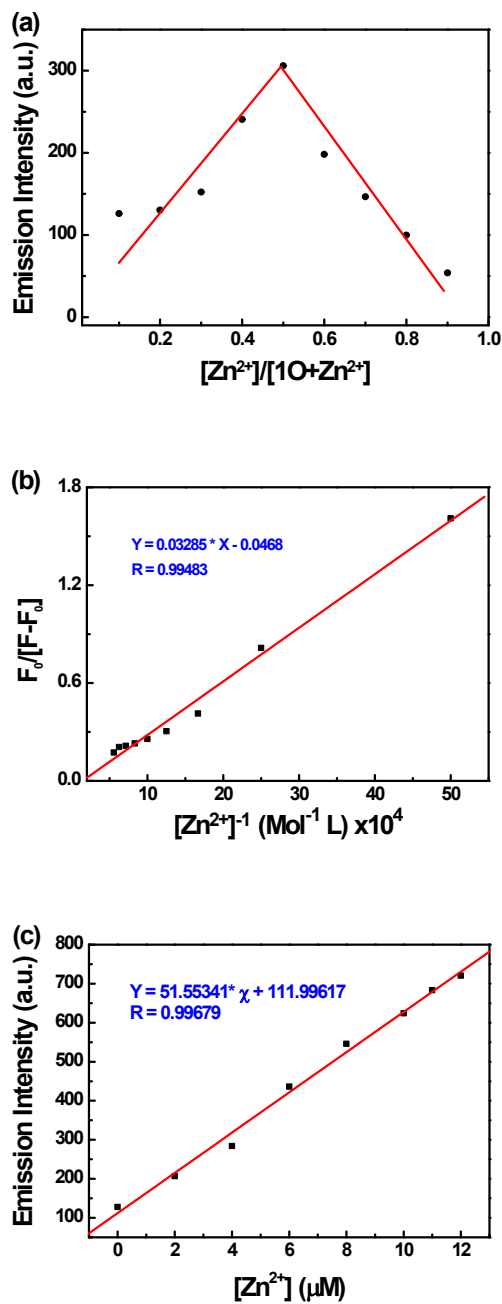

**Fig. S5.** (a) Job's plot showing the 1 : 1 complex of **10** with  $Zn^{2+}$ ; (b) Hildebrand–Benesi plot based on the 1 : 1 for **10**, the binding constant of **10** with  $Zn^{2+}$  was calculated to be  $1.42 \times 10^4 \text{ L mol}^{-1}$ ; (c) the limit of detection (LOD), LOD is  $3.33 \times 10^{-7} \text{ mol L}^{-1}$ .

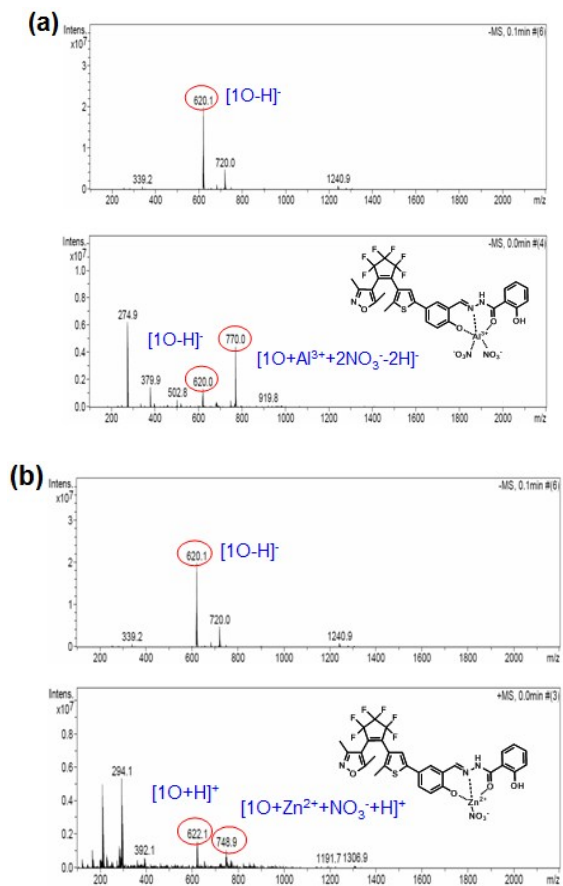

**Fig. S6.** ESI-MS spectrum changes in methanol: (a)  $[1O+Al^{3+}+2NO_3^- - 2H]^-$ ; (b)  $[1O+Zn^{2+}+NO_3^- + H]^+$ .
